# Supplementary material for: Carboxylate trapping engineering to fabricate monodispersed dual-atom iron sites for efficient oxygen reduction
Source: Royal Society of Chemistry journal article supplement (doi:10.1039/d4qi00124a), 2024-01-01
Supplement: d4qi00124a1.pdf [file d4qi00124a1.pdf]

Electronic Supplementary Material

## **Carboxylate Trapping Engineering to Fabricate Monodispersed Dual-Atom Iron Sites for Efficient Oxygen Reduction**

Hailiang Chu,<sup>a</sup> Yilong Wu,<sup>a</sup> Shujun Qiu,<sup>a</sup> Chunfeng Shao,<sup>\*ab</sup> Yongpeng Xia,<sup>a</sup> Yongjin Zou,<sup>a</sup>

Baitao Li,<sup>c</sup> Kai Dai,<sup>\*b</sup> Lixian Sun<sup>\*a</sup>

<sup>a</sup> Guangxi Key Laboratory of Information Materials, Guangxi Collaborative Innovation Center of Structure and Property for New Energy and Materials, and School of Materials Science and Engineering, Guilin University of Electronic Technology, Guilin, 541004, P.R. China

<sup>b</sup> Anhui Province Key Laboratory of Pollutant Sensitive Materials and Environmental Remediation, Department of Materials Science and Engineering, Huaibei Normal University, Huaibei 235000, P.R. China

<sup>c</sup> Guangdong Provincial Key Laboratory of Fuel Cell Technology, School of Chemistry and Chemical Engineering, South China University of Technology, Guangzhou 510640, P.R. China

\* Corresponding authors.

E-mails:

shaocf@chnu.edu.cn (C. Shao)

daikai940@chnu.edu.cn (K. Dai)

sunlx@guet.edu.cn (L. Sun)

1. Figures

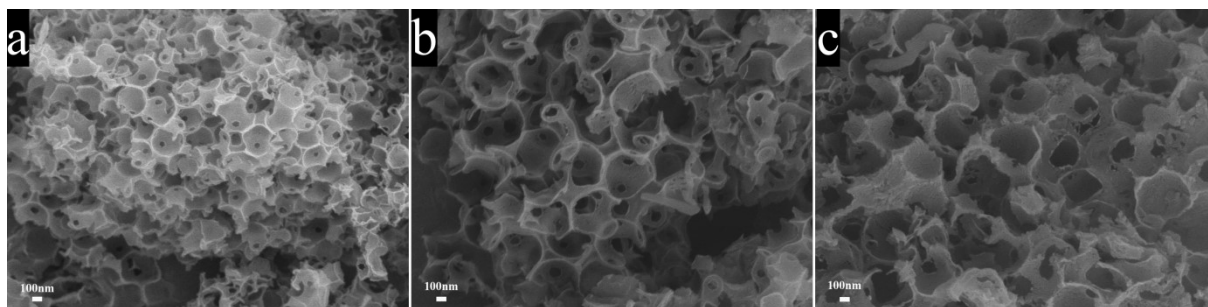

**Fig. S1.** SEM images of (a) 0.05FeNC-OAc, (b) 0.8FeNC-OAc, and (c) 1.6FeNC-OAc.

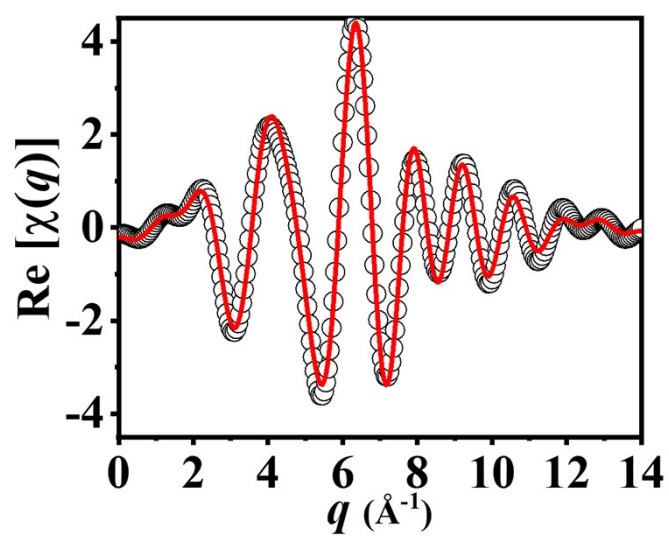

**Fig. S2.** The fitting curves in q-space

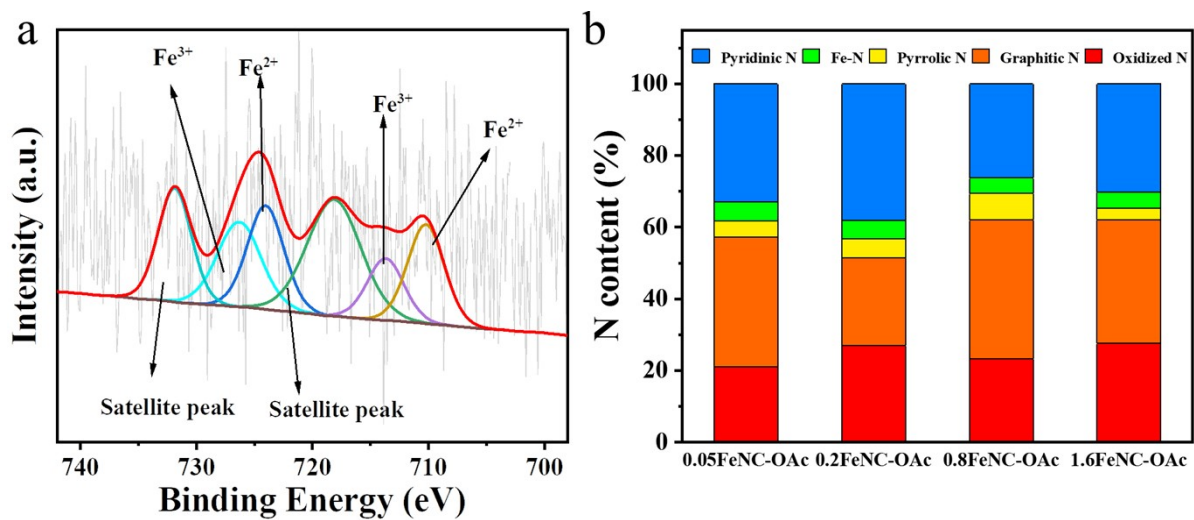

**Fig. S3** XPS of 0.2FeNC-OAc: (a) Fe 2p high-resolution spectra and (b) Nitrogen content of the different N species from XPS.

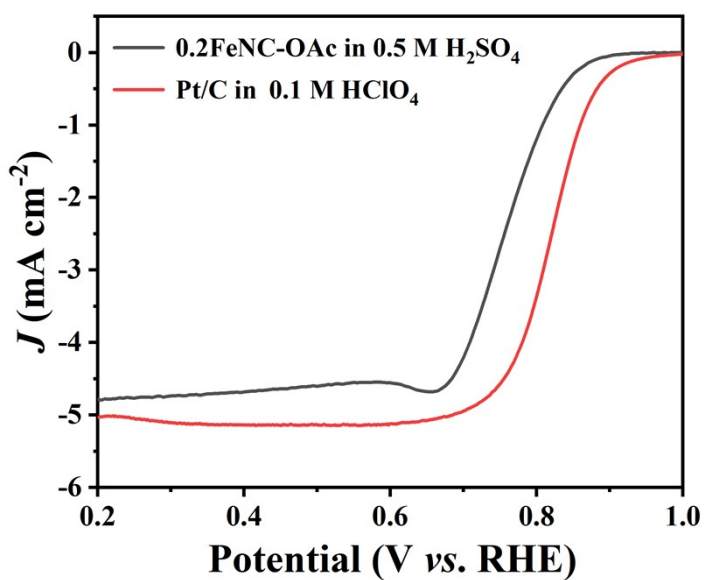

**Fig. S4** ORR polarization curves of 0.2FeNC-OAc catalysts in 0.5 M H<sub>2</sub>SO<sub>4</sub> and Pt/C in 0.1 M HClO<sub>4</sub>

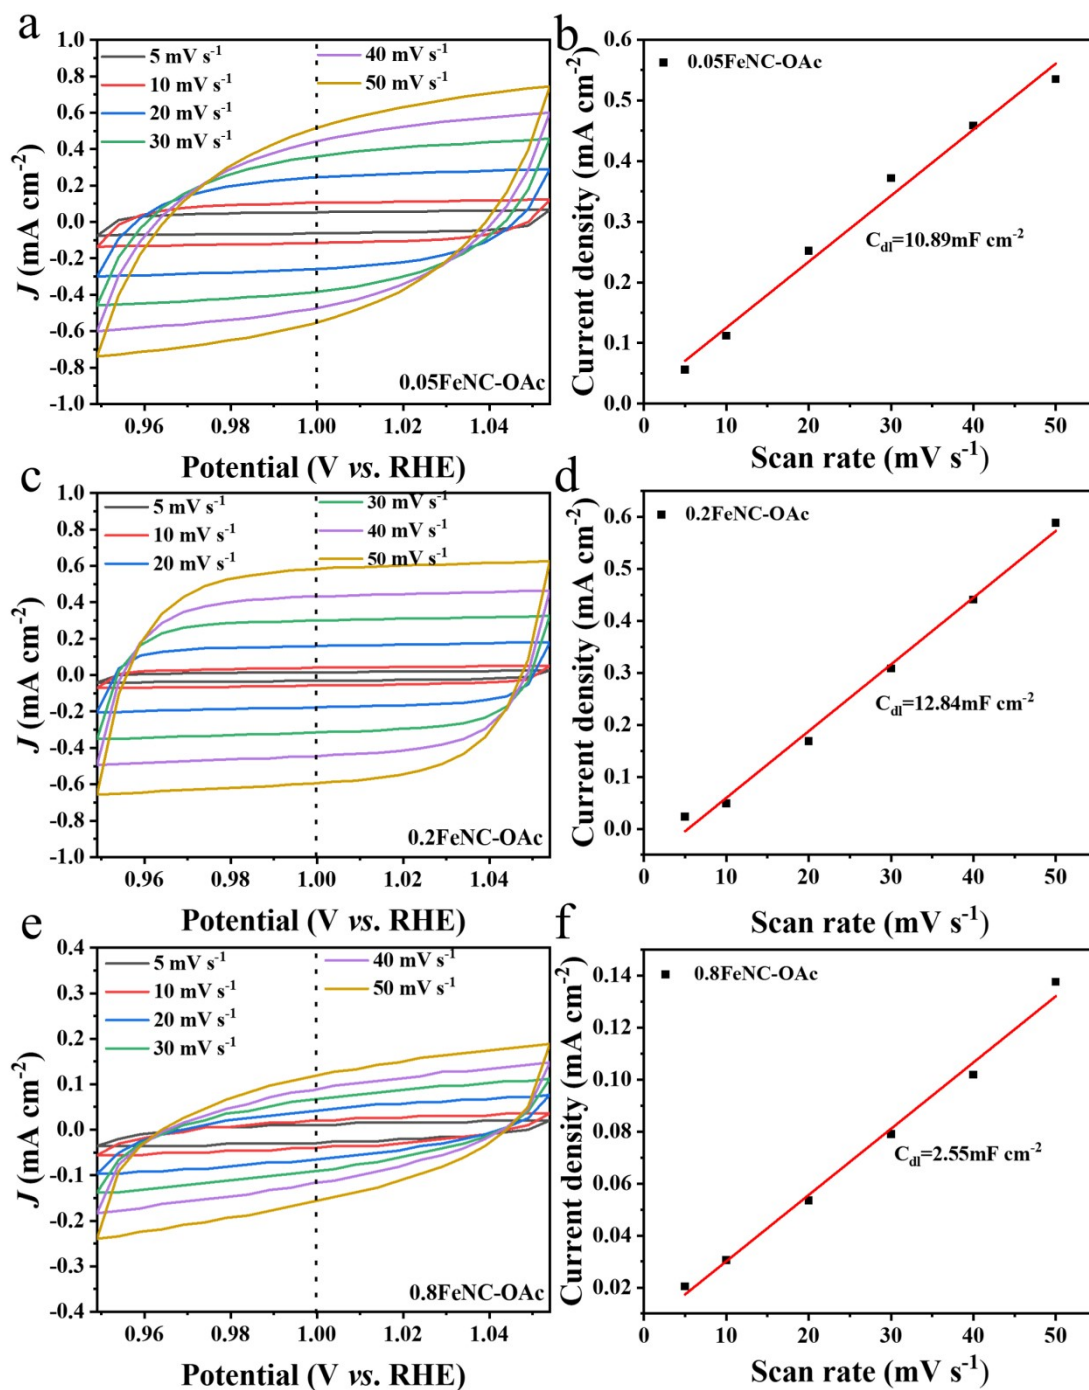

**Fig. S5** (a, c, and e) Corresponding capacitive  $\Delta j$  at the potential of 1.00 V (vs. RHE) plots to estimate the electrochemical double-layer capacitances ( $C_{dl}$ ) for (b) 0.05FeNC-OAc, (d) 0.2FeNC-OAc, and (f) 0.8FeNC-OAc.

## 2. Tables

**Table S1** Fitting parameters of EXAFS for 0.2FeNC-OAc and FePc reference.

| Catalysts   | Path  | Coordination | Bond length        | $\Delta E_0$ [eV] | R factor |
|-------------|-------|--------------|--------------------|-------------------|----------|
|             |       | Number [N]   | R [ $\text{\AA}$ ] |                   |          |
| 0.2FeNC-OAc | Fe-N  | 4.2          | 2.03               | 1.28              | 0.021    |
|             | Fe-Fe | 0.9          | 2.54               | 1.28              | 0.021    |
|             | Fe-O  | 0.7          | 1.49               | 1.28              | 0.021    |
| FePc        | Fe-N  | 3.84         | 1.92               | 6.51              | 0.0196   |

Note:  $\Delta E_0$  is inner potential correction; R factor is the goodness of fitting result.

**Table S2.** Textural parameters of all  $n$ FeNC-OAc catalyst according to  $N_2$  sorption isotherms.

| Catalysts   | BET SSA <sup>a</sup> [ $\text{m}^2 \cdot \text{g}^{-1}$ ] |                      |                    | $S_{\text{ext}}/S_{\text{micro}}^e$ | $V_{\text{total}}^f$<br>[ $\text{cm}^3 \cdot \text{g}^{-1}$ ] | APD <sup>g</sup><br>[nm] |
|-------------|-----------------------------------------------------------|----------------------|--------------------|-------------------------------------|---------------------------------------------------------------|--------------------------|
|             | $S_{\text{total}}^b$                                      | $S_{\text{micro}}^c$ | $S_{\text{ext}}^d$ |                                     |                                                               |                          |
| 0.2FeNC-OAc | 664                                                       | 416                  | 248                | 62.7%                               | 0.74                                                          | 4.47                     |
| 0.8FeNC-OAc | 676                                                       | 213                  | 463                | 31.5%                               | 0.85                                                          | 5.00                     |
| 1.6FeNC-OAc | 656                                                       | 104                  | 552                | 15.9%                               | 0.88                                                          | 5.39                     |

<sup>a</sup> Brunauer-Emmett-Teller specific surface (BET SSA); <sup>b</sup> total specific surface; <sup>c</sup> micropore ratio surface; <sup>d</sup> external surface; <sup>e</sup> Proportion of the micropore surface area in the total SSA; <sup>f</sup> total pore capacity; <sup>g</sup> average pore size.
